## CORRIGENDUM

# A pathway-based analysis provides additional support for an immune-related genetic susceptibility to Parkinson's disease

Peter Holmans, Valentina Moskvina, Lesley Jones, Manu Sharma, The International Parkinson's Disease Genomics Consortium (IPDGC), Alexey Vedernikov, Finja Buchel, Mohamad Saad, Jose M. Bras, Francesco Bettella, Nayia Nicolaou, Javier Simón-Sánchez, Florian Mittag, J. Raphael Gibbs, Claudia Schulte, Alexandra Durr, Rita Guerreiro, Dena Hernandez, Alexis Brice, Hreinn Stefánsson, Kari Majamaa, Thomas Gasser, Peter Heutink, Nicholas W. Wood, Maria Martinez, Andrew B. Singleton, Michael A. Nalls, John Hardy, Huw R. Morris and Nigel M. Williams

*Human Molecular Genetics* 2013 **22**:5; pp. 1039–1049; doi:10.1093/hmg/dds492

One of the author's names was incorrectly shown as Mohamad Sadd when it should have been Mohamad Saad as shown above. The authors apologise for this mistake.
